# Supplementary material
Source: PubMed Central journal article supplement (PMC4463192)
Supplement: JCI77321sd.pdf [file JCI77321sd.pdf]

**Supplemental Figure S1. Coding sequence of p16 TALE-DNMT3a-3L.**

ATGTCGGGACCACCGGCTCCCTTCCCAACCCGACCCAGCCAGCGTTTTCGGCCGACTCGTTCTCAGACCTGCTTAGGCAGTTCGACCCCTCACTGT  
TTAACACATCGTGTTCGACTCCCTTCTCCGTTTGGGGCGCACCATACGGAGGCGCCACCGGGGAGTGGGATGAGGTGCAGTCGGGATTGAGAGC  
TGCGGATGCACCACCCCAACCATGCGGGTGGCCGTACCCGCTGCCGACCGCCGAGGGCGAAGCCCGACCAAGGCGGAGGGCAGCGCAACCGTCC  
GACGCAAGCCCGCAGCCCAAGTAGATTGAGAACTTTGGGATATTCACAGCAGCAGCAGGAAAGATCAAGCCCAAAGTGGGTTCGACAGTCCGCGC  
AGCATCACGAAGCGCTGGTGGGTCATGGGTTTACACATGCCACATCGTAGCCTTGTTCGAGCACCCTGCAGCCCTTGGCACGGTTCGCGCTCAAGTA  
CCAGGACATGATTCGCGGCTTGCAGGAGCCACACATGAGGCGATCGTCGGTGTGGGAAACAGTGGAGCGGAGCCCGAGCGCTTGGAGCCCTGTTG  
ACGGTTCGCGGGAGAGTGCAGAGGGCCCTCCCTTTCAGCTGGACACGGCCAGTGTCTGAAGATCGCGAAGCGGGGAGGAGTACGCGGCTCGAGGGC  
TGCACCGCTGGCGCAATGCGCTCACGGGAGCACCCCTCAACCTGACCCAGAGCAGGTCGTGGCAATTGCGAGCCATGACGGGGGAAAGCAGGCAT  
CGAAACCGTCCAGAGGTTGCTGCCTGTGCTGTGCCAAGCGCACGGACTTACGCCAGAGCAGGTCGTGGCAATTGCGAGCCATGACGGGGGAAAGCAG  
GCCTCGAAACCGTCCAGAGGTTGCTGCCTGTGCTGTGCCAAGCGCACGGACTAACCCAGAGCAGGTCGTGGCAATTGCGAGCAACGGAGGGGAA  
AGCAGGCACTCGAAACCGTCCAGAGGTTGCTGCCTGTGCTGTGCCAAGCGCACGGGTTGACCCAGAGCAGGTCGTGGCAATTGCGAGCCATGACGG  
GGAAAGCAGGCACTCGAAACCGTCCAGAGGTTGCTGCCTGTGCTGTGCCAAGCGCACGGCCGACCCAGAGCAGGTCGTGGCAATTGCGAGCCAT  
GACGGGGGAAAGCAGGCACTCGAAACCGTCCAGAGGTTGCTGCCTGTGCTGTGCCAAGCGCACGGACTTACACCCGAACAAGTCGTGGCAAT  
GCAACGGAGGGGAAAGCAGGCACTCGAAACCGTCCAGAGGTTGCTGCCTGTGCTGTGCCAAGCGCACGGACTTACACCCGAACAAGTCGTGGCAAT  
TGCAGGCAACGGAGGGGAAAGCAGGCACTCGAAACCGTCCAGAGGTTGCTGCCTGTGCTGTGCCAAGCGCACGGACTTACGCCAGAGCAGGTCGTG  
GCAATTGCGAGCCATGACGGGGGAAAGCAGGCACTCGAAACCGTCCAGAGGTTGCTGCCTGTGCTGTGCCAAGCGCACGGACTAACCCAGAGCAGG  
TCGTGGCAATTGCGAGCCATGACGGGGGAAAGCAGGCACTCGAAACCGTCCAGAGGTTGCTGCCTGTGCTGTGCCAAGCGCACGGGTTGACCCAGA  
GCAGGTCGTGGCAATTGCGAGCAACGGAGGGGAAAGCAGGCACTCGAAACCGTCCAGAGGTTGCTGCCTGTGCTGTGCCAAGCGCACGGCCGACCC  
CCAGAGCAGGTCGTGGCAATTGCGAGCAACGGAGGGGAAAGCAGGCACTCGAAACCGTCCAGAGGTTGCTGCCTGTGCTGTGCCAAGCGCACGGAC  
TGACACACAGCAGGTCGTGGCAATTGCGAGCAACCGAGGGGAAAGCAGGCACTCGAAACCGTCCAGAGGTTGCTGCCTGTGCTGTGCCAAGCGCA  
CGCCCTCACCCAGAGGTCGTGGCAATTGCGAGCCATGACGGGGGAAAGCAGGCACTCGAAACCGTCCAGAGGTTGCTGCCTGTGCTGTGCCA  
GCGCACGGACTTACGCCAGAGCAGGTCGTGGCAATTGCGAGCCATGACGGGGGAAAGCAGGCACTCGAAACCGTCCAGAGGTTGCTGCCTGTGCTGT  
GCCAAGCGCACGGACTAACCCAGAGCAGGTCGTGGCAATTGCGAGCAACATCGGGGGAAAGCAGGCACTCGAAACCGTCCAGAGGTTGCTGCCTGT  
GCTGTGCCAAGCGCACGGGTTGACCCAGAGCAGGTCGTGGCAATTGCGAGCAACATCGGGGGAAAGCAGGCACTCGAAACCGTCCAGAGGTTGCTG  
CTGTGCTGTGCTGTGCCAAGCGCACGGCTGACCCAGAGCAGGTCGTGGCAATTGCGAGCCATGACGGGGGAAAGCAGGCACTCGAAACCGTCCAGAGG  
TGTGCCTGTGCTGTGCCAAGCGCACGGACTGACACCAGAGCAGGTCGTGGCAATTGCGAGCAACCGAGGGGAAAGCAGGCACTCGAAACCGTCCA  
GAGGTTGCTGCCTGTGTTATGTCAGGCCATGGGCTCACCCAGAGCAGGTCGTGGCAATTGCGAGCCATGACGGGGGAAAGCAGGCACTCGAAAC  
GTCCAGAGGTTGCTGCCTGTGCTGTGCCAAGCGCACGGACTTACGCCAGAGCAGGTCGTGGCAATTGCGAGCAACGGAGGGGAAAGCAGGCACTCG  
AAACCGTCCAGAGGTTGCTGCCTGTGCTGTGCCAAGCGCACGGACTAACCCAGAGCAGGTCGTGGCAATTGCGAGCAACCGAGGGGAAAGCAGG  
ACTCGAAACCGTCCAGAGGTTGCTGCCTGTGCTGTGCCAAGCGCACGGGTTGACCCAGAGCAGGTCGTGGCAATTGCGAGCAACCGAGGGGAAAG  
CAGGCACTCGAAACCGTCCAGAGGTTGCTGCCTGTGCTGTGCCAAGCGCACGGCTGACCCAGAGCAGGTCGTGGCAATTGCGAGCCATGACGGGG  
GAAAGCAGGCACTCGAAACCGTCCAGAGGTTGCTGCCTGTGCTGTGCCAAGCGCACGGACTGACACCAGAGCAGGTCGTGGCAATTGCGAGCAACCG  
AGGGGGAAAGCAGGCACTCGAAACCGTCCAGAGGTTGCTGCCTGTGCTGTGCCAAGCGCACGGACTCACGCCAGAGGTCGTGGCAATTGCGATCC  
CATGACGGGGGACAGCCCGACTGGAGTCAATCGTGGCCAGCTTTCGAGGCGGACCCCGCGCTGGCCGCACTCACTAATGATCATCTTGTAGCGC  
TGGCCTGCCTCGGCGGACGACCCGCTTGGATCGGGTGAAGAAGGGGCTCCCGCACCGCCCTGCATTTGATTAAGCGGACCAACAGAAGGATTTCCCGA  
GAGGACATCACATCGAGTGGCAGATCACGCGCAAGTGGTCCGGTGCCTCGGATTTCTCCAGGTTCACGCCAGCCCGGCAAGGTCGTGGCAATTGCG  
ATGACTCAATTTGGTATGTCGAGACACGGACTGCTGCAGCTCTTTCGTAGAGTCGGTGTACAGAACTCGAGGCGCCGCTGGGCACTGCCTCCCG  
CTTCCAGCGGTTGGGACAGGATTTCCAGCGAGCGGTATGAAACCGCGGAAGCCCTTCACTACGTCAACTCAGACACTGACCCAGGCGAGCCCTCA  
TGCGTTCGAGACTCGCTGGAGAGGATTTGGACGCGCCCTCGCCATGCAATGAAGGGGACCAAACTCGCGCTCAGCAAGCCCAAGAAGAAGAGA  
AAGGTGGAGCCAGCGGTACCAACCATGACAGGAATTTGACCCCAAGGTTTACCACCTGTGCCAGTGAAGAGCAAGCCCATCGCGCTGCTGCTCT  
TGCTCTCTTTGATGGGATGCTACAGGGCTCTTGGTGTGAAGGACTGGGCATCCAAGTGGACCGTACATTGCCCTCCAGGTTGTGTGAGGACTC  
CATCACGTTGGGATGTTGCGGCACAGGGAAAGATCATGTAGCTCGGGGACGTCGCGAGCGTCACACAGAAGCATATCCAGAGTGGGGCCCATTC  
GACCTGGTGTATGGAGCAGTCCCTGCAATGACCTCTCATTTGCAACCTCGCCCAAGGACTTTATGAGGTTACTGGCCGCTCTTCTTTGAGT  
TCTACCGCTCTGCAATGACCGCGCCCAAGGAGGATGATGACCCCTTCCGCTCTTTGGCTCTTTGAGAATGTGGTGGCCATGGGCGTTAGTGACAA  
GAGGACATTCGCGATTTCTTGAAGTCTAACCCGTTGATGATTGACGCCAAGAAGTGTCTGCTGCACACAGGGCCGTTACTTCTGGGGTAACTTT  
CCTGGCATGAACAGGCTTTGGCATCCACTGTGAATGATAAGCTGGAGCTGCAAGAGTGTCTGGAGCAGGCAAGATAGCCAAGTTCAGCAAAGTGA  
GGACATTACCCAGGTCAACTCTATAAAGCAGGGCAAAGACGACTTCCCGTCTTCAATGAAACGAGAAAGGAGACATCCCTGTGGTGCAGTGA  
AATGGAAAGGCTGTTGGCTTCCCTCCACTACAGAGCTCTCAAACATGAGCCGTTGGCGAGGCAAGACTGCTGGGCGGATCGTGGAGCGGTG  
CCGGTCAATCCGCCACCTCTCGTCCGCTGAAGGAATATTTGCTTGTGTGAGCAGCGGCAACAGCAACGCCAACAGCCCGGCCCCAGCTTACGCA  
GCGGCTGGTGCCTGAGCCTGCGCGGAGCCACATGGGCCCTATGGAGATATAAGACAGTGTCTGCATGGAAGAGACAGCCAGTGGCGGTACT  
GAGCCTTTTGAATAATGATAAAGTACTAAAGGTTTGGGCTTTTGGAAAGCGGTTCTGGTCTGGGGGAGGAACGCTGAAGTACGTGGAAGAT  
GTCACAAATGTCGTGAGGAGAGAGCTGGAGAAATGGGGCCCTTTGACCTGGTGTACGGCTCGACGCAGCCCTAGGCAGCTCTTGTGATCGCTGT  
CCGGCTGGTACATGTTCCAGTTCACCCGAATCTGCAATGCGCTGCTCGCCAGGAGAGTCAAGCGCCCTTCTTCTGGATATTCATGGACAACT  
GCTGTGACTGAGGATGACCAAGAGCAACTACCCGCTTCTTCCAGAGGCTGTGACCCCTCAGGATGTCCTGGCAGAGACTACCAGAAATGCT  
ATGCGGGTGTGGAGCAACATCCAGGGCTGAAGAGCAAGCATGCGCCCTGACCCCAAAGGAAGAAGAGTATCTGCAAGCCCAAGTCAAGAGCAGGA  
GCAAGCTGGACGCCCCGAAAGTTGACCTCCTGGTGAAGAACTGCCTTCTCCGCTGAGAGAGTACTTCAAGTATTTTTCTCAAACCTCACTTCTCT  
TGCTAGCGACTACAAAGCCATGACGGTGAATATAAAGATCATGACATCGACTACAAGGATGACGATGACAAGTCTAGGGCAGTGGAGAGGGCAGAG  
GAAGTCTGCTAAATCGGCTGACGTCGAGGAGAATCTTGGCCAGTGAAGGCGAGGAGCTGTTACCGGGTGGTCCCATCTTGTGCTGAGCT  
GGACCGGAGCTAAACCGGCCAAGTTTCAAGCTGTCCGCGAGGGCGAGGCGCAATGCCACCTACGGCAAGCTGACGTTTCACTGCACTGCACTC  
CGCAAGCTGCCCTGCCCAGGCTTACGTCAGGAGCGCACTTCTTCAAGGACGAGCGCAACTACAGACCCGCGCGGAGTGAAGTTCG  
AGGGCACACCTTGGTGAACCGCATCGAGCTGAAGGCACTGACTTCAAGGAGGACGGCAACATCTTGGGCAAGCTGGAGTCAACTTACAACAG  
CCACAGCTCTATATCATGGCCGACAAGCAGAAGACGGCATCAAGGTTGAATTCATGATCCGCCAACAACTCGAACCCAGGCTGCAAGCTGCGC  
GACCACTACCAGCAACACCCCATCGGCGAGGCCCCGCTGTGCTGCCGACAACCACTACCTGAGCACCAGTCCGCGCTGAGCAAGACCCCA  
ACGAGAAGCGCATCATGTTCTGCTGGAGTTCGTGACCGCCCGGGATCACTCTCGGCATGGACGAGCTGTACAAGTAA

**Legend:**

- TALE N-Terminus and C-Terminus
- p16 TALE repeat domain
- Dnmt3a-3L
- 2A GFP

**Supplemental Figure S2. Jumbled p16 TALE repeat domain.**

CTGACCCCGAGCAAGTCGTCGCCATCGCCAGTAACGGAGGCGGCAACAAGCCCTGGAGACTGTCCAACGACTTTTGCCTGTCTCTGCCAGGCC  
ATGTTTTGACTCCTGAGCAGGTGGTGGCTATAGCTTCCATGACGGTGGTAAACAAGCTTTGGAGACTGTTTCAGAGGCTGCTCCGGTGTGTGTCA  
AGCGCACGGCCTTACGCCGGAACAGGTGCGTGGCGATTGCGTACATGACGGGGGAAACAAGCGCTCGAAACCGTGCACGGCTTCTGCCCGTCTTG  
TGCCAGGCTCATGGGCTCACCCCGAGCAGGTTGTTGCTATCGCATCTAACGGAGGAGGCAAGCAAGCGTTGGAAACGGTTCAAAGGCTTCTCCCCG  
TGCTCTGTCAAGCCACGGACTTACTCCAGAGCAGGTAGTCGCGATAGCGAGTAACGGAGGGGTAAGCAAGCTCTCGAAACTGTACAGAGACTGCT  
TCCGGTACTTTGCCAGGCACATGGCTTGACACCGGAGCAAGTTGTAGCCATTGCCTCAAACCACGGTGGGAAGCAAGCCCTTGAGACAGTCCAGCGA  
TTGCTGCTGTATGTGTCAAGCTCACGGTTTGACGCCGGAACAAGTCGTAGCTATCGCTAGCCATGACGGCGGGAAGCAGGCTCTTGAAACAGTTC  
AGCGGTTGCTTCCCGTACTCTGTCAAGCTCACGGCTGACTCCCGAACAGGTCGTTGCCATAGCCTCTCATGACGGCGGTAACAGGCCTTGGAAC  
TGTCAAAGACTTCTTCCGTGCTTGTGTCAAGCCACGGGCTTACCCCGAGCAGGTTGTGGCCATTGCATCAAACATCGGAGGTAAGCAGGCGCTG  
GAGACTGTGCAACGCCTTCTGCCAGTTTTGTGCCAGGCGCACGGACTTACACCTGAACAGGTAGTGGCAATTGCAAGCAACATCGGAGGGAACAGG  
CCCTCGAAACGGTACAGCGGCTGCTCCCTGTGCTCTGCCAAGCCCATGGATTGACCCAGAGCAAGTAGTTGCGATAGCCTCACATGACGGTGGAAA  
GCAGGCATTGGAGACAGTGCAGCGCCTGTTGCCCGTCTTTGCCAAGCTCATGGTCTTACACCCGAGCAAGTGGTCGCAATCGCGTCTAACCCAGG  
GGCAAACAGGCTCTCGAAACCGTACAACGACTCCTTCCAGTGTCTTGTCAAGCGCATGGCCTCACGCCAGAACAGGTGGTAGCGATCGCGAGCCATG  
ACGGGGGAAACAGGCATTGAAACCGTTCAACGCCTTGTGCCAGTCTGTGCCAGGCACACGGTCTGACACCAGAGCAGGTGGTTGCAATTGCGAG  
TAACGGAGGAGGGAAGCAAGCACTCGAAACAGTACAGCGACTCCTCCCTGTGCTGTGCCAAGCTCACGGATTGACCCCTGAACAAGTTGTAGCGATA  
GCATCTAACCCAGGCGGAAACAGGCGCTGAAACGGTGCAAAGGCTCCTTCCCGTCTTTGTCAGGCCCATGGCCTCACTCCGGAACAAGTCGTCG  
CTATTGCTAGTAACCAGGTGGCAAGCAGGCCCTTGAACGGTCCAGAGGTTGTGCCGGTCTCTGTCAAGCATATGGGCTCACACCAGAACAAGT  
AGTAGCAATAGCCAGCCATGACGGAGGAAACAAGCACTTGTAGACAGTACAAAGACTCCTCCAGTACTGTGCCAAGCACACGGGCTGACGCCTGAA  
CAAGTGGTTGCAATCGCTTCAAACGGAGGTGGAAGCAAGCTTGTGAAACTGTTTCAGCGCTTCTCCCGTCTGTGTCAAGGCGCATGGA

**A**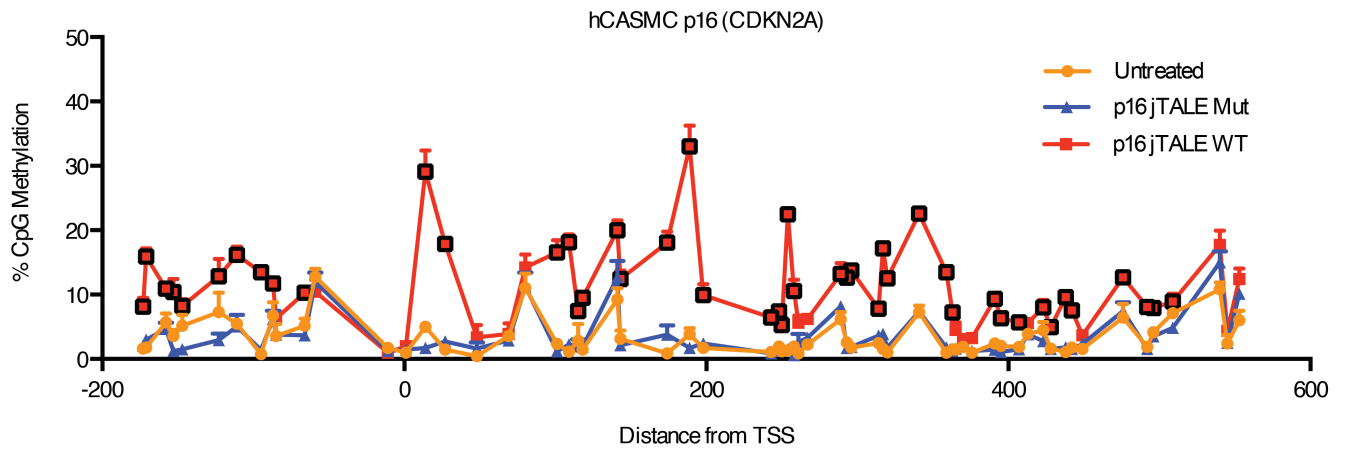**B**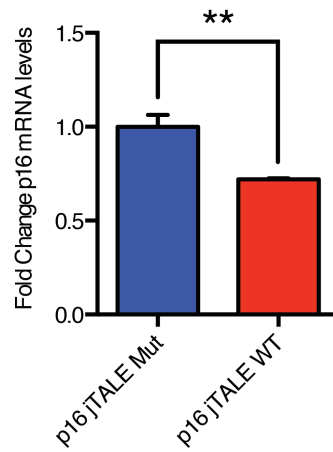

**Supplemental Figure S3. p16 TALE-DNMT strategy can be employed in primary human coronary artery smooth muscle cells to decrease p16 expression.** Primary human coronary artery smooth muscle cells (hCASCs) were infected with p16 jTALE-DNMT wild-type or mutant lentivirus. After 4 days of infection, cells were harvested and assessed for DNA methylation (**A**) and p16 (*CDKN2A*) expression (**B**) as described in the main text.

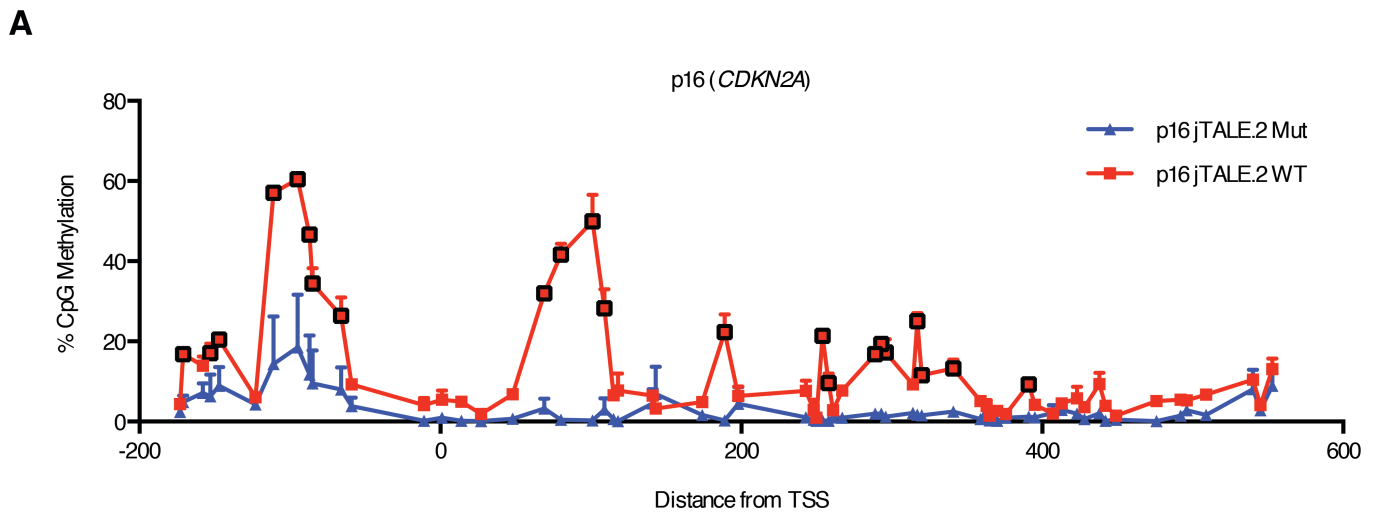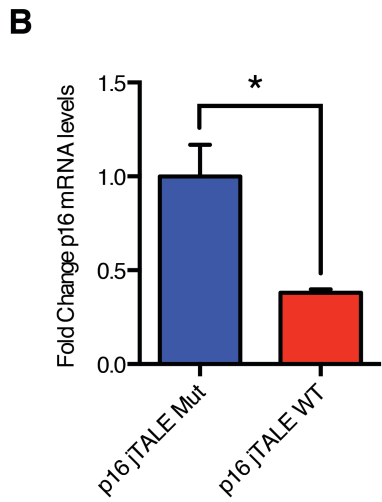

**Supplemental Figure S4. Multiple p16 TALE-DNMT constructs can be designed to decrease p16 expression.** An additional TALE-DNMT (p16 jTALE-DNMT.2) was designed to target the p16 (*CDKN2A*) promoter region 118 to 139 base pairs upstream of the transcription start site. Wild-type and mutant infected with p16 jTALE-DNMT.2 were evaluated for DNA methylation (**A**) and p16 (*CDKN2A*) gene expression (**B**) as described in prior human fibroblast experiments.

**Supplemental Table 1. PCR primers for amplification of bisulfite converted genomic DNA.** Primers were designed to PCR amplify regions of interest from bisulfite converted genomic DNA. Each primer pair amplifies an approximately 250-300 base pair region within the CpG island closest to the transcription start site of the gene analyzed. In instances where there was not a CpG island near the gene, the promoter was evaluated. Amplicons were subsequently used to prepare DNA sequencing libraries for DNA methylation analysis.

| Locus                | Coordinates                 | Forward (5' to 3')          | Reverse (5' to 3')         |
|----------------------|-----------------------------|-----------------------------|----------------------------|
| <i>CDKN2A_1</i>      | chr9:21,975,075-21,975,330  | ATTTGGTAGTTAGGAAGGTTGTA     | CCCTAAAATCCCCCAAATTAATCTCC |
| <i>CDKN2A_2</i>      | chr9:21,974,909-21,975,178  | GGTGGGGAGGAGTTTAGT          | AACCAACCCCTCCTCTTT         |
| <i>CDKN2A_3</i>      | chr9:21,974,597-21,974,918  | GGGGTTGGTTGGTTATTAGAG       | CCTAATTCCAATTCCCCTACAACTT  |
| <i>CDKN2A_4</i>      | chr9:21,974,558-21,974,863  | AGAGGGGGAGAGTAGGTA          | CCAAAAACCTCCCCTTTTTCC      |
| <i>CDKN2A CGI2</i>   | chr9:21,970,930-21,971,229  | GTATGGTTATTGTTTTGGTGT       | ACCATTCTATTCTCTCTAACAAATCA |
| <i>CDKN2A CGI3</i>   | chr9:21,968,280-21,968,569  | AGGTAAAGATGTGTGGTATATT      | ACAACCACTAAAACCTATTATATAAC |
| <i>CDKN2A CGI3_2</i> | chr9:21,968,551-21,968,805  | AATGAGTTTTAGTGGTTGTTTATAAT  | AACACATAAATAAATAAACATCCATT |
| <i>ACTB</i>          | chr7:5,570,376-5,570,636    | TGGGAGTTTAGTGTTAAGAGATGTTTA | CCCTCTCCCCTCCTTTTTAC       |
| <i>CDKN2B_1</i>      | chr9:22,009,012-22,009,290  | AGGAGGGGTAGTGAGGATT         | ACACTCTCCCTTCTTTCC         |
| <i>CDKN2B_2</i>      | chr9:22,008,863-22,009,088  | GGGTAATGAAGTTGAGTTTAGG      | CACCTTCTCCACTAATCCC        |
| <i>p14ARF</i>        | chr9:21,995,629-21,995,928  | TGGGAATAGTAAAAGTAGGGTAAGG   | ACACCCACCCACTCAAAC         |
| <i>MTAP</i>          | chr9:21,802,505-21,802,762  | GGAAAGGTTTGAAAAGGG          | AATACCAAAAACCATATCTACAC    |
| <i>IFNE</i>          | chr9:21,481,642-21,481,862  | GAAAAGGGAATTTGAAAATTTAATGT  | AATAAAAACCAACAACACCAACACA  |
| <i>CDKN2C</i>        | chr1:51,435,514-51,435,751  | GGAGGATTTGTTTTGTAGTTTTG     | CACAAACACACATACATTCTAATT   |
| <i>CDKN2D</i>        | chr19:10,679,809-10,680,058 | TTTATAGGGTTTGTATAATTAGTGG   | CTACCTCCCTTCCCTCAAA        |
| <i>CDKN1A</i>        | chr6:36,651,742-36,651,971  | GATTAGTTGGAAGGAGTGAGAGA     | ACTCAACTACTCCCTATCCACTAAAC |
| <i>CDKN1B</i>        | chr12:12,869,846-12,870,092 | GGGTAGAGTTGGGGGTAG          | ACAAACCTACTCTAACTAACCT     |
| <i>CDKN1C</i>        | chr11:2,907,681-2,907,919   | GGTTTGGTTAAGGTTGAGAAG       | AACCCTCACACACTACT          |
| <i>RB1</i>           | chr13:48,877,360-48,877,609 | GTGATTTTAAAAGGTTAGTAAGTG    | AAACCTCATCCCTATCCC         |
| <i>CDK4</i>          | chr12:58,145,866-58,146,110 | GGTGAGGGGGTTTTTTTAGT        | ACCCTTCCATAACCAACTC        |
| <i>CDK6</i>          | chr7:92,462,912-92,463,146  | GGTTTGGGAGAGGGTAGG          | ATCCCTCCTCTTCCCTCC         |
| <i>CCND1</i>         | chr11:69,455,880-69,456,104 | ATTATAGGGGAGTTTTGTTGAAGTT   | CAACACAAAAACTAATATTCCATAAC |

**Supplemental Table 2.** qPCR primers for gene expression analysis

| <b>Locus</b>              | <b>Forward (5' to 3')</b> | <b>Reverse (5' to 3')</b> |
|---------------------------|---------------------------|---------------------------|
| <i>HPRT1</i>              | GCAGACTTTGCTTTCCTTGG      | AACACTTCGTGGGGTCCTTT      |
| <i>CDKN2A</i><br>(p16)    | CCCAACGCACCGAATAGTT       | AGCAGCAGCTCCGCCACT        |
| <i>CDKN2A</i><br>(p14ARF) | AGAACATGGTGCGCAGGT        | GGGATGTGAACCACGAAAAC      |
| <i>CDKN2B</i>             | GCTGTTTCATCAGCAGCCTA      | CCACAATGGAGCTAGAAGCA      |
| <i>MTAP</i>               | CTACCTCAGGGCATGGTTGT      | TGCTGGCTAAATGCTTGTTG      |
| <i>IFNE</i>               | ACCCTTGAACGACATGAAGC      | AAGAATCATGTCTGGAGAAGTCC   |
| <i>CDKN2C</i>             | GTGATTTGGCCAGGCTCTAT      | AGCCCTCCCCACGTTTATT       |
| <i>CDKN2D</i>             | CCAAGGGCAGAGCATTAAAG      | AAGCAACGTGCACACTTCAG      |
| <i>CDKN1A</i>             | GATTAGCAGCGGAACAAGGA      | CAACTACTCCCAGCCCCATA      |
| <i>CDKN1B</i>             | GAGGTGCTTGGGAGTTTTGA      | TGTTTACACAGCCCGAAGTG      |
| <i>CDKN1C</i>             | CAGCGTTCGGTTTTGTTTTT      | GGGACCAGTGTACCTTCTCG      |
| <i>RB1</i>                | AGGGCTTACTATTTCTGGGTCTT   | CAATACACGATCTCTGAAGTTCC   |
| <i>CDK4</i>               | CGAGCTCTGCAGCACTCTTA      | AGAAGGGAAATGGCAGCTTT      |
| <i>CDK6</i>               | TGTCTATCTCCCGGCACTTC      | TGAAAGCAAGCAAACAGGTG      |
| <i>CCND1</i>              | AGCGCTGTTTTTGTGTGTG       | CTTGCCTCAAAGTCCTGCTT      |
